# Supplementary material for: Age-related differences in clinical presentation, histopathology, and outcomes in minimal change disease: a TSN-GOLD national registry analysis
Source: Research Square preprint supplement (doi:10.21203/rs.3.rs-8070995/v1), 2025-12-01
Supplement: Supplementary file 1 [file 8bac7b675e5e63935016b37f.docx]

**Supplementary Table 1. Full immunofluorescence profile by age group in minimal change disease (TSN-GOLD registry)**

| Marker | <40 years (n=237) | 40–64 years (n=120) | ≥65 years (n=22) | *p* value |
| --- | --- | --- | --- | --- |
| IgG positivity | 5·9% | 5·0% | 9·1% | 0·528 |
| IgM positivity | 18·2% | 20·0% | 13·6% | 0·478 |
| IgA positivity | 3·8% | 6·7% | 4·5% | 0·780 |
| C3 positivity | 13·7% | 9·4% | 18·2% | 0·744 |
| C1q positivity | 3·2% | 10·7% | 0% | 0·030* |
| κ light chain positivity | 3·9% | 4·1% | 0% | 0·026* |
| λ light chain positivity | 4·4% | 2·1% | 0% | 0·008* |
| Fibrinogen positivity | 2·5% | 3·1% | 0% | 0·619 |

*Values shown as percentage of patients with positive staining. Significant p-values indicated with an asterisk.*

**Table S2. Subgroup analysis of relapse predictors by age group**

| Predictor | <40 years (n=237) | 40–64 years (n=120) | ≥65 years (n=22) | OR (95% CI) | *p* value |
| --- | --- | --- | --- | --- | --- |
| Male sex | 43·2% relapsed vs 42·5% non-relapsed | 39·1% vs 49·0% | 15·4% vs 20·0% | 1·12 (0·76–1·66) | 0·41 |
| Baseline hypertension | 20·0% vs 8·2% | 44·0% vs 25·0% | 50·0% vs 30·0% | 1·95 (1·21–3·13) | 0·009* |
| Baseline eGFR <60 mL/min/1·73 m² | 5·0% vs 1·5% | 18·0% vs 8·0% | 35·0% vs 15·0% | 2·08 (1·10–3·92) | 0·021* |
| Nephrotic-range proteinuria (>3·5 g/day) | 90·0% vs 85·0% | 88·0% vs 82·0% | 95·0% vs 80·0% | 1·44 (0·72–2·87) | 0·28 |
| Chronic histological lesion (fibrosis/atrophy ≥ grade 1) | 10·0% vs 5·0% | 35·0% vs 20·0% | 45·0% vs 25·0% | 2·56 (1·34–4·87) | 0·004* |
| Immunosuppressive adverse event | 30·0% vs 15·0% | 48·0% vs 22·0% | 35·0% vs 15·0% | 2·12 (1·17–3·82) | 0·012* |

*Relapse defined as recurrence of proteinuria after complete or partial remission. OR = odds ratio. CI = confidence interval. Significant predictors highlighted.*
